# Supplementary material
Source: PubMed Central journal article supplement (PMC6644463)
Supplement: ao8b00774_si_001.pdf [file ao8b00774_si_001.pdf]

## Supporting Information

### Plasmon-Mediated Drilling in Thin Metallic Nanostructures

*Danielle M. McRae<sup>†</sup>, Keuna Jeon<sup>†</sup>, François Lagugné-Labarhet<sup>\*†</sup>*

<sup>†</sup> Department of Chemistry, University of Western Ontario, 1151 Richmond Street, London, Ontario, N6A 5B7, Canada.

\* E-mail address: [flagugne@uwo.ca](mailto:flagugne@uwo.ca) (F.L-L.)

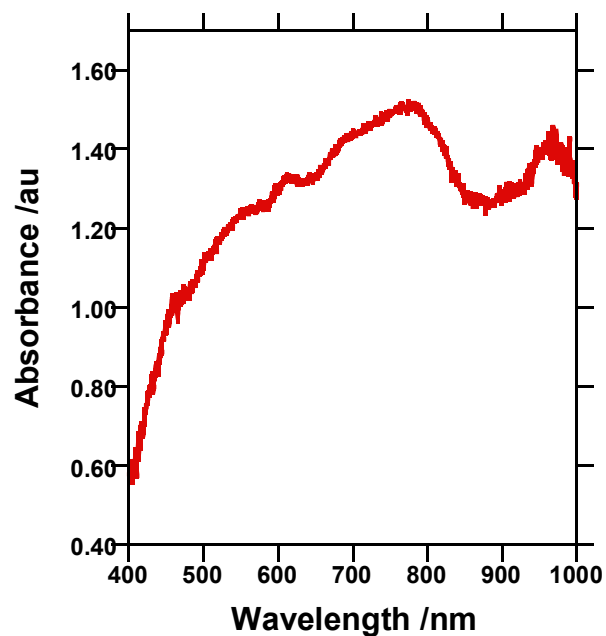

**Figure S1.** Absorbance spectrum of silver nanoplates.

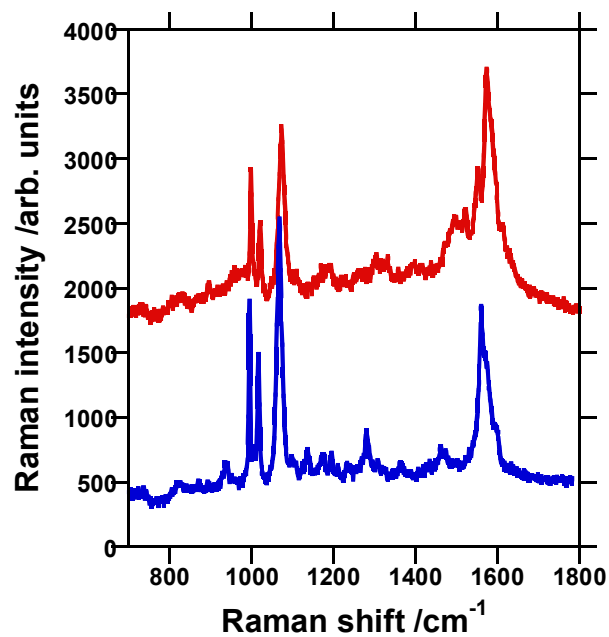

**Figure S2.:** SERS spectrum (red), multiplied by ten, compared to a typical TERS spectrum (blue). Spectra have been offset for clarity.

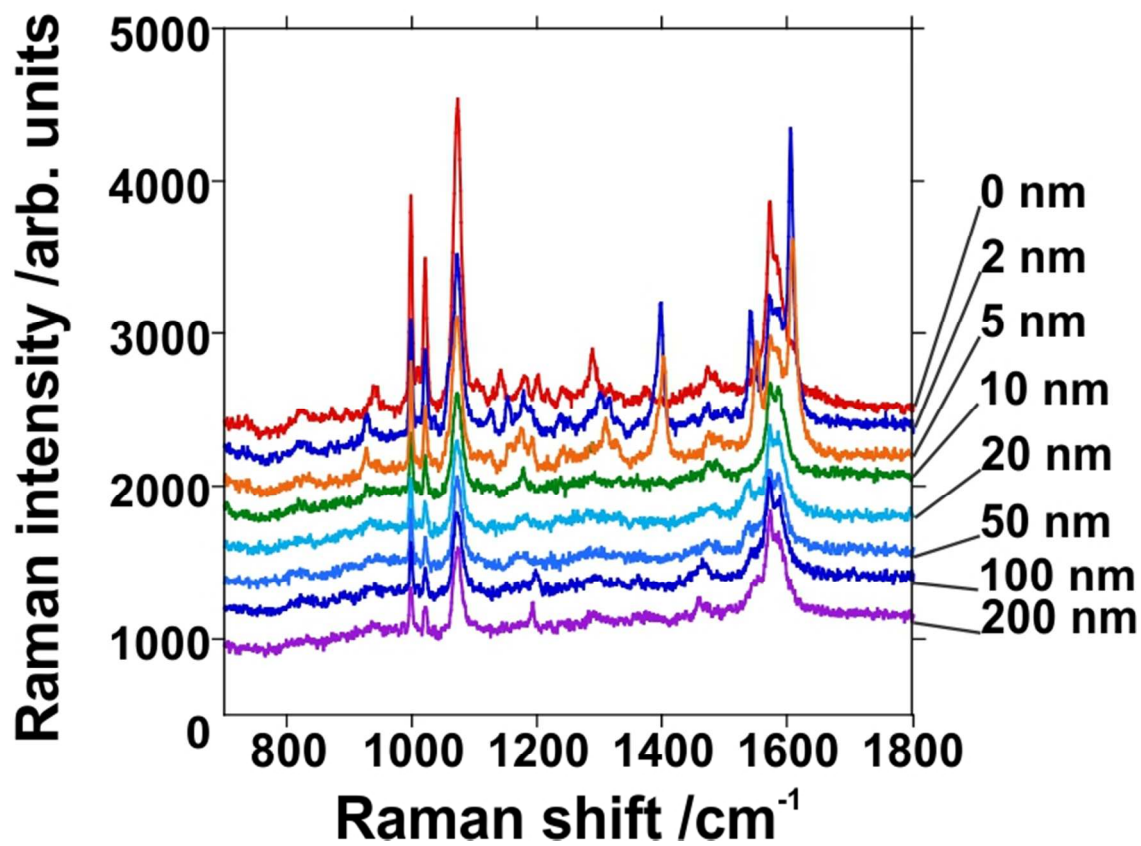

**Figure S3.** TERS spectra obtained upon increasing the tip-sample distance, as indicated. Spectra have been offset for clarity

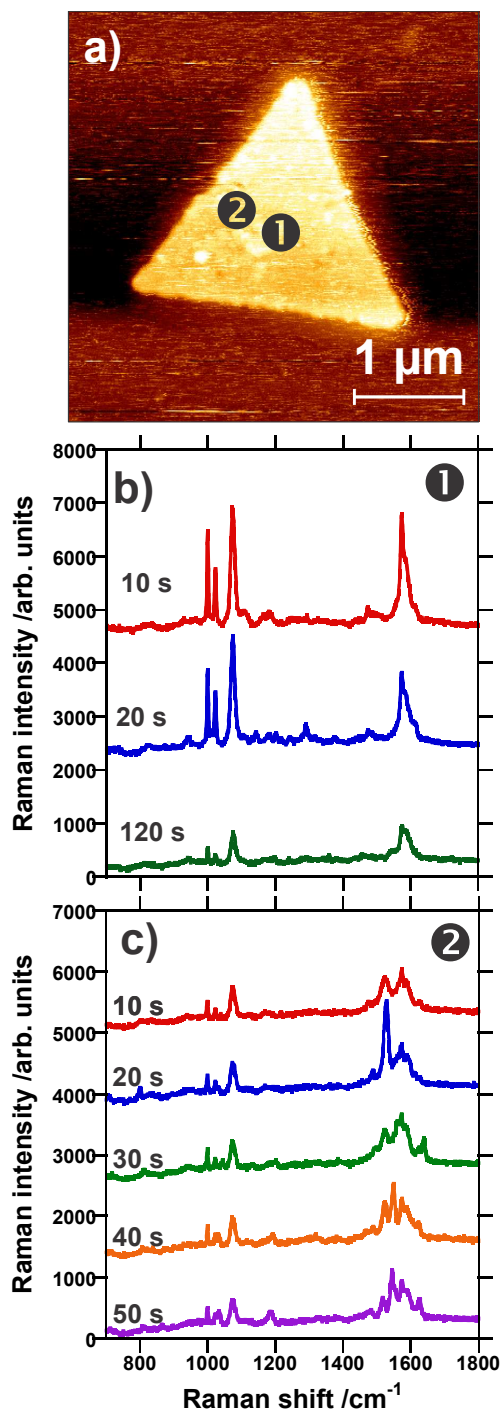

**Figure S4:** a) Time lapse experiments conducted on two distinct points (1) and (2). b) Series of three spectra collected under continuous irradiation on point 1 after irradiation of 10, 20 and 120 s. The Au-coated tip was new. c) Series of 5 spectra collected on point (2) after irradiation of 10, 20, 30, 40, 50 s. The Au coated tip was used to conduct the experiments in point (1).

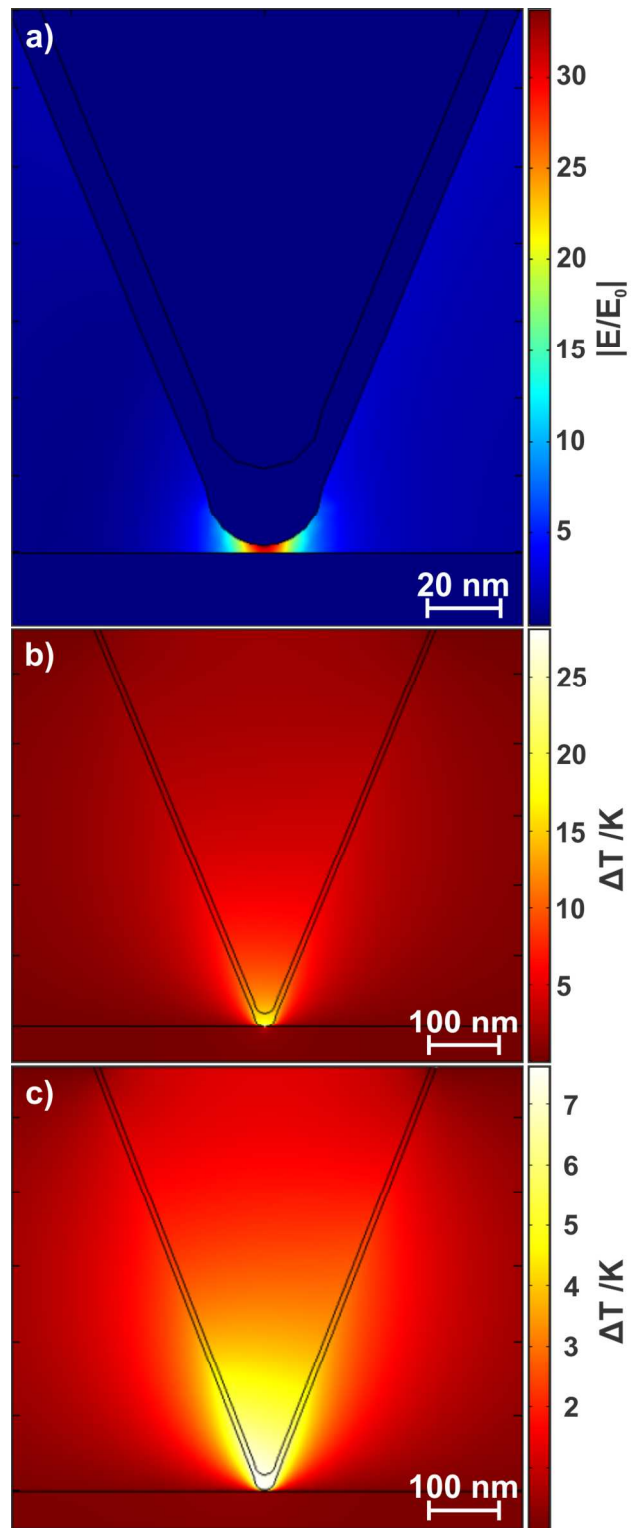

**Figure S5.** a) Electric field at tip, with the laser polarized along the tip axis; b) Temperature rise at tip-sample contact; c) Temperature rise at a tip-sample distance of 2 nm.

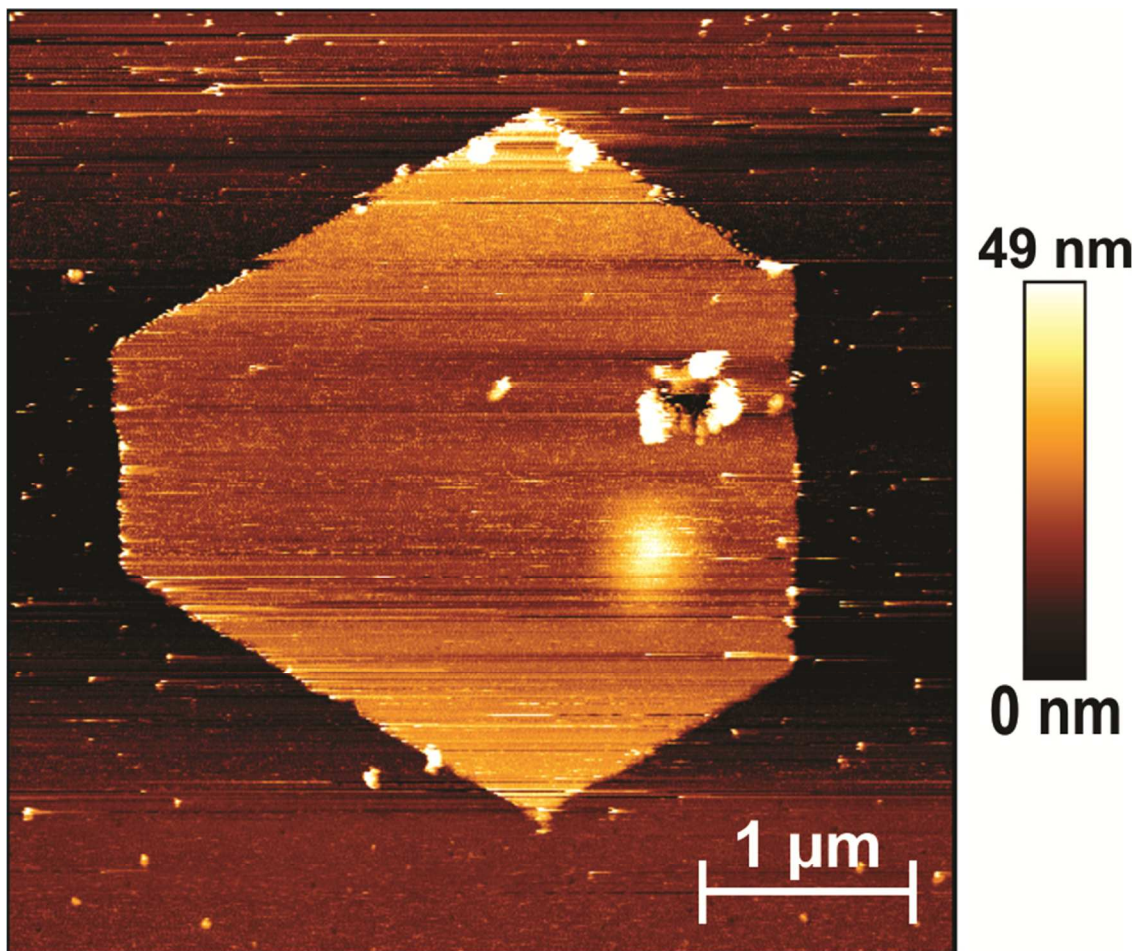

**Figure S6.** Atomic force micrograph of drilled silver nanoplate corresponding to the tip examined by EDX.

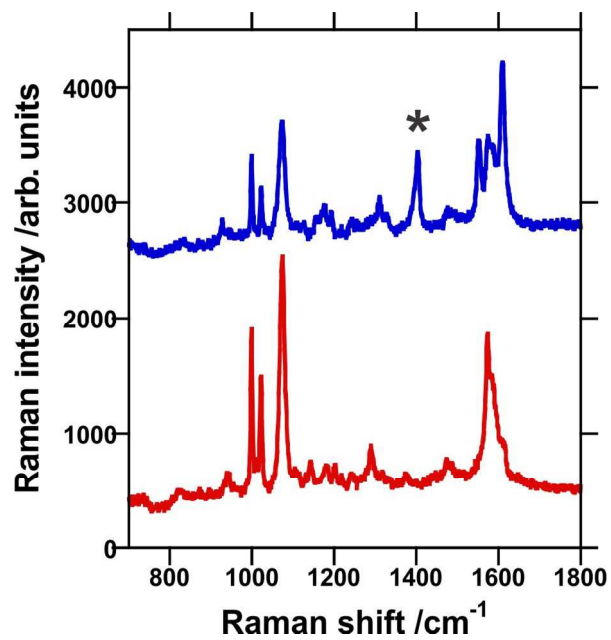

**Figure S7.** Comparison of a TERS spectra including citrate (blue) to a typical TERS spectrum of 4-MPBA (red). Spectra have been offset for clarity.

**Table S1: Material properties for finite-element simulations**

| Material | $\rho$<br>/kg·m <sup>-3</sup><br>(ref. 1) | $k$ /W·m <sup>-1</sup> ·K <sup>-1</sup><br>(ref. 1) | $C_p$ /J·kg <sup>-1</sup> ·K <sup>-1</sup><br>(ref. 1) | $\sigma$ /S·m <sup>-1</sup><br>(ref. 2) | $n$                               | $\epsilon$<br>(ref. 3) | $\gamma$<br>(ref. 4) |
|----------|-------------------------------------------|-----------------------------------------------------|--------------------------------------------------------|-----------------------------------------|-----------------------------------|------------------------|----------------------|
| Au       | 19300                                     | 317                                                 | 129                                                    | $4.10 \times 10^7$                      | -                                 | -11.740<br>- 1.2611i   | -                    |
| Air      | 1.205                                     | 0.0258                                              | 1005                                                   | -                                       | 1<br>(ref. 1)                     | -                      | 1.4                  |
| Ag       | 10500                                     | 429                                                 | 235                                                    | $6.30 \times 10^7$                      | 0.056206<br>+ 4.2776i<br>(ref. 3) | -18.281 -<br>0.48108i  | -                    |
| Si       | 2329                                      | 130                                                 | 700                                                    | -                                       | 3.8823<br>+ 0.019589i<br>(ref. 1) | -                      | -                    |



## REFERENCES

1. "COMSOL Multiphysics 5.2", COMSOL, Inc, [www.comsol.com](http://www.comsol.com)
2. Serway, R. A., Principles of Physics, 2nd ed.; London Saunders College Pub.: Fort Worth, Texas, 1998; pp. 602.
3. Johnson, P. B.; Christy, R. W., Optical Constants of the Noble Metals. *Phys. Rev. B* 1972, 6, 4370-4379
4. White, F. M., Appendix A: Physical Properties of Fluids. In *Fluid Mechanics*, 7th ed.; McGraw-Hill.: Boston., 2011; pp. 827.
